# Supplementary material for: Prioritising Patients for Publicly Funded Bariatric Surgery in Queensland, Australia
Source: Research Square preprint supplement (doi:10.21203/rs.3.rs-4428314/v1), 2024-05-30
Supplement: Supplementary file 1 [file 07a5f39ad81edadf2c05ec11.xlsx]

## Sheet: Sheet1
Table 2. Characteristics of patients referred to the BSI, stratified by BAPT score
BAPT score	10–19	20–29	30–39	40–49	50–59	60–69	70–79	p-value
N	13	34	77	74	56	27	11
Age, years	58.0 ± 4.0	55.4 ± 6.2	54.7 ± 6.7	53.2 ± 9.0	49.2 ± 8.1	45.2 ± 10.7	40.3 ± 6.8	< 0.001*
Sex								0.13
Males	8 (61.5%)	16 (47.1%)	35 (45.5%)	34 (45.9%)	23 (41.1%)	8 (29.6%)	1 (9.1%)
Females	5 (38.5%)	18 (52.9%)	42 (54.5%)	40 (54.1%)	33 (58.9%)	19 (70.4%)	10 (90.9%)
Weight, kg	115 ± 22.2	119.0 ± 21.3	125.6 ± 19.9	133.3 ± 20.0	137.5 ± 19.1	142.9 ± 14.5	134.0 ± 17.4	< 0.001*
BMI, kg/m2	38.6 ± 5.6	41.3 ± 5.5	44.3 ± 5.6	46.7 ± 6.6	49.1 ± 6.7	50.7 ± 6.9	49.6 ± 7.7	< 0.001*
Diabetes
HbA1c, %	8.2 ± 0.6	9.2 ± 1.7	8.7 ± 1.2	8.6 ± 1.3	8.5 ± 1.4	9.4 ± 2.0	9.5 ± 1.7	0.1
Oral medications	13 (100%)	33 (100%)	75 (98.6)	72 (97.3%)	56 (100%)	26 (96.3%)	11 (100%)	0.7
Insulin	11 (84.6%)	25 (75.8%)	58 (76.2%)	47 (63.5%)	31 (55.3%)	13 (48.1%)	2 (18.2%)	< 0.001*
Duration of diabetes
Less than 4 years	0 (0.0%)	0 (0.0%)	0 (0.0%)	4 (5.4%)	10 (17.9%)	11 (40.7%)	9 (81.8%)	< 0.001*
4–8 years	0 (0.0%)	0 (0.0%)	14 (18.2%)	18 (24.3%)	33 (58.9%)	15 (55.6%)	2 (18.2%)	< 0.001*
Longer than 8 years	13 (100%)	34 (100%)	63 (81.8%)	52 (70.3%)	13 (23.2%)	1 (3.7%)	0 (0.0%)	< 0.001*
Comorbidities
Hypertension	13 (100%)	31 (96.9%)a	67 (89.3%)b	68 (93.2%)c	44 (81.5%)d	23 (95.8%)e	6 (54.5%)f
Dyslipidaemia	13 (100%)	28 (82.4%)	71 (92.2%)	62 (83.8%)	48 (85.7%)	19 (70.4%)	8 (72.7%)
Sleep apnoea	3 (30%)	8 (47.1%)g	34 (65.4%)h	43 (74.1%)i	37 (82.2%)j	16 (80.0%)k	7 (100%)l
Joint pain	5 (38.5%)	14 (41.2%)	36 (46.8%)	53 (72.6%)c	30 (54.5%)	19 (70.4%)	5 (45.5%)
NASH	1 (7.7%)	4 (11.8%)	9 (11.8%)	9 (12.2%)	11 (19.6%)	1 (3.7%)	1 (9.1%)
Renal impairment	0 (0.0%)	3 (8.8%)	7 (9.1%)	8 (11.0%)	3 (5.4%)	1 (3.7%)	0 (0.0%)
Reproductive issues	0 (0.0%)	6 (18.2%)m	9 (11.7%)	25 (33.8%)	9 (16.1%)	8 (29.6%)	4 (36.4%)
Data are presented as mean ± standard deviation or N (%). N = 292 patients.
* statistically significant, p < 0.05.
a N = 32, b N = 75, c N = 73, d N = 54, e N = 24, f N = 11, g N = 17, h N = 52, i N = 58, j N = 45, k N = 20, l N = 7, m N = 33.
