# Supplementary material for: Prioritising Patients for Publicly Funded Bariatric Surgery in Queensland, Australia
Source: Research Square preprint supplement (doi:10.21203/rs.3.rs-4428314/v1), 2024-05-30
Supplement: Supplementary file 2 [file 1598e2ac0722ceda1d76e0e7.xlsx]

## Sheet: Sheet1
Table 1. Weighting criteria for scoring patients with the BAPT
Criterion	Mean	SD	Normalised score	Rounded score	Maximum criterion score
Impact on life (comorbidities)
Minimal impact	0	0	0
Hypertension	8.72	4.88	1.96	2
Dyslipidaemia	9.93	4.9	2.23	2
Non-alcoholic steatohepatitis	13.36	4.54	3.01	3
Albuminuria	15.43	5.52	3.47	3
Joint pain	16.06	5.19	3.61	4
Reproductive issues a	17.41	4.49	3.92	4
Renal impairment (incl hyperfiltration)	23.43	5.11	5.27	5
Obstructive sleep apnoea	30.28	7.46	6.81	7	30
Duration of diabetes
Diabetes > 8 years	0	0	0	0
Diabetes 4–8 years	11.92	8.1	11.92	12
Diabetes < 4 years	19.92	14.42	19.92	20	20
BMI
35 to < 40	0	0	0	0
40 to < 45	8.63	4.9	8.63	10
45 to < 50	11.58	4.77	11.58	13
> 50	14.92	4.54	14.92	15	15
Age
50 years and over	0	0	0	0
30–49 years	8.76	3.66	8.76	10
18–29 years	15.17	7.84	15.17	15	15
Surgical risk
(risk factors: male, age 45+, BMI ≥ 50 kg/m2, hypertension, risk of pulmonary embolism)
12× risk (4 to 5 factors)	0	0	0	0
5× risk (2 to 3 factors)	11.34	9.04	11.34	10
Normal or slightly increased risk (0 or 1 factor)	19.7	11.62	19.7	20	20
a Reproductive issues include obstetric/gynaecological issues, infertility, male hypogonadism and erectile dysfunction.
