# Supplementary material for: Prioritising Patients for Publicly Funded Bariatric Surgery in Queensland, Australia
Source: Research Square preprint supplement (doi:10.21203/rs.3.rs-4428314/v1), 2024-05-30
Supplement: Supplementary file 3 [file 7e69f3968ed860d4f377c89a.xlsx]

## Sheet: Sheet1
Table 3. Comparison of patient outcomes with age and BMI cut-offs
Age/BMI	N	Decrease in BMI, %	Improvement in HbA1c, %	No diabetes meds post-surgery, n (%)
Age 18–49	45	24.6 ± 9.9	27.3 ± 18.4	26 (59.1%)
Age ≥ 50	85	22.9 ± 8.4	20.1 ± 13.6	37 (43.5%)
p-value:		0.3	0.01*	0.07
Age 18–54	73	24.9 ± 9.7	24.7 ± 16.3	38 (52.8%)
Age ≥ 55	57	21.8 ± 7.7	19.7 ± 14.6	25 (43.9%)
p-value		0.05	0.08	0.3
Age 18–59	100	23.7 ± 9.3	23.9 ± 15.8	48 (48.5%)
Age ≥ 60	30	22.9 ± 7.6	17.9 ± 14.6	15 (50.0%)
p-value		0.7	0.07	0.9
BMI < 40	50	22.3 ± 7.1	21.8 ± 14.2	16 (32.0%)
BMI ≥ 40	80	24.3 ± 9.9	22.9 ± 16.6	47 (59.5%)
p-value		0.2	0.7	0.002*
BMI < 45	83	22.3 ± 7.9	22.3 ± 15.2	36 (43.4%)
BMI ≥ 45	47	25.6 ± 10.3	22.7 ± 16.8	27 (58.7%)
p-value		0.04*	0.9	0.1
BMI < 50	111	23.4 ± 9.0	23.4 ± 15.3	52 (47.3%)
BMI ≥ 50	19	24.4 ± 8.8	17.1 ± 17.1	11 (57.9%)
p-value		0.6	0.1	0.4
* statistically significant p < 0.05.
Percentage improvement/decrease was calculated at 12-month post-surgery follow-up relative to referral.
